# Supplementary material for: Low cost bio-derived carbon-sprinkled manganese dioxide as an efficient sulfur host for lithium–sulfur batteries
Source: Royal Society of Chemistry journal article supplement (doi:10.1039/c8ra03793k), 2018-01-01
Supplement: c8ra03793k1.pdf [file c8ra03793k1.pdf]

## Supplementary Information

### Low Cost Bio Derived Carbon Sprinkled Manganese Dioxide as an Efficient Sulfur Host for Lithium-Sulfur Battery

Aswathy Raghunandanan, Ulaganathan Mani, Ragupathy Pitchai\*

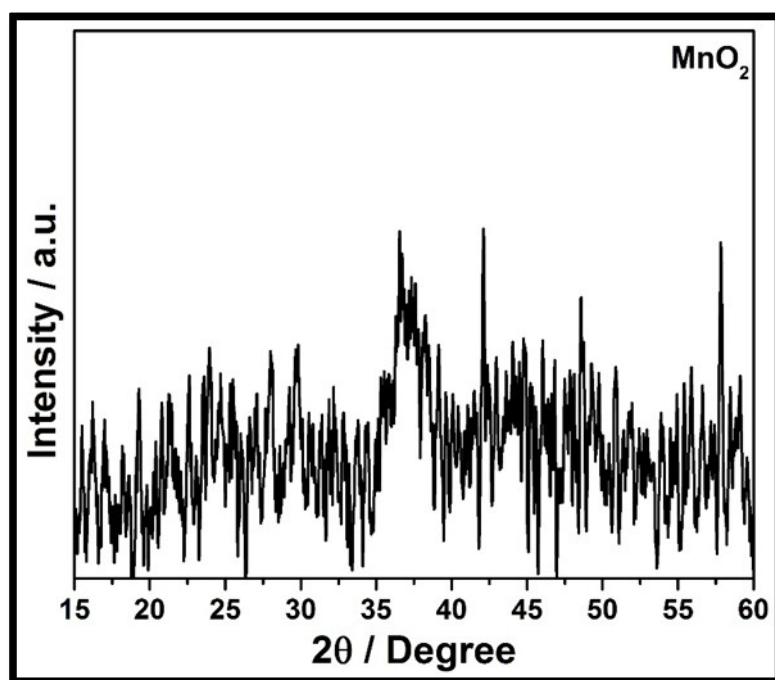

*Fig. S1: XRD pattern of MnO<sub>2</sub>*

*Table S1: Carbon-MnO<sub>2</sub> composite synthesized via various methods have been used as cathode in Li-S system*

| Sl. No. | Material                                         | Specific capacity (mAh g <sup>-1</sup> ) | Cycle performance                                              | Coulombic efficiency (%) | Reference |
|---------|--------------------------------------------------|------------------------------------------|----------------------------------------------------------------|--------------------------|-----------|
| 1       | CNF-MnO <sub>2</sub> -Sulfur                     | 995 at 0.2C                              | 600 mAh g <sup>-1</sup> after 400 cycles at 1C                 | 99.66                    | 1         |
| 2       | Carbon-MnO <sub>2</sub> hollow nanofibers-Sulfur | 1248 at 0.1C                             | 0.050% capacity decay rate per cycle over 1000 cycles at 2.0 C | 98                       | 2         |

|    |                                                                                            |                             |                                                                    |     |               |
|----|--------------------------------------------------------------------------------------------|-----------------------------|--------------------------------------------------------------------|-----|---------------|
| 3  | Core-shell $\gamma$ -MnO <sub>2</sub> -Sulfur                                              | 1350 at 0.1C                | Fade rate of 0.07% per cycle over 600 cycles at 1 C                | 95  | 3             |
| 4  | Dual Core-Shell-Structured S@C@MnO <sub>2</sub>                                            | 1345 at 0.1C                | Capacity decay rate of 0.052% per cycle after 1000 cycles at 3.0 C | 98  | 4             |
| 5  | 3D porous reduced graphene oxide/ultrathin MnO <sub>2</sub> nanosheets-S aerogel composite | 1360 at 0.1C                | Capacity decay of 0.092% over 200 cycles at 0.2C                   | 99  | 5             |
| 6  | Sulfur-MnO <sub>2</sub> @graphene                                                          | 1416 at 0.1C                | 74% retention after 100 cycles at 0.2C                             |     | 6             |
| 7  | MnO <sub>2</sub> @hollow carbon boxes-                                                     | 1042 at 1 A g <sup>-1</sup> | Stable over 500 cycles                                             | 100 | 7             |
| 8  | GF/MWMCNT/MnO <sub>2</sub>                                                                 | 1270 at 0.1C                | 824 mAh g <sup>-1</sup> was retained after 160 cycles              | 99  | 8             |
| 9  | Sulfur/manganese dioxide nanosheet                                                         |                             | Capacity decay of 0.036%/cycle over 2,000 cycles                   | 98  | 9             |
| 10 | C-hemp/MnO <sub>2</sub> -Sulfur                                                            | 926 at 0.1C                 | 74% retention over 100 cycles at 0.1 C                             | 91  | Present study |

## References

- 1 T. An, D. Deng, M. Lei, Q.-H. Wu, Z. Tian, M. Zheng and Q. Dong, *J. Mater. Chem. A*, 2016, **4**, 12858–12864.
- 2 L. Ni, G. Zhao, Y. Wang, Z. Wu, W. Wang, Y. Liao, G. Yang and G. Diao, *Chem. - An Asian J.*, 2017, **12**, 3128–3134.
- 3 L. Ni, Z. Wu, G. Zhao, C. Sun and C. Zhou, *Small*, 2017, 1–11.
- 4 and G. D. Lubin Ni, Gangjin Zhao, Guang Yang, Guosheng Niu, Ming Chen, *ACS Appl. Mater. Interfaces*, 2017, **9**, 34793–34803.
- 5 X. Zhao, H. Wang, G. Zhai and G. Wang, *Chem. - A Eur. J.*, 2017, **23**, 7037–7045.
- 6 G. Yuan, H. Jin, Y. Jin and L. Wu, *J Solid State Electrochem.*
- 7 S. Rehman, T. Tang, Z. Ali, X. Huang and Y. Hou, *Small*, 2017, 1700087.
- 8 P. Ragupathy, S. A. Ahad, P. R. Kumar, H.-W. Lee and D. K. Kim, *Adv. Sustain. Syst.*, 2017, **1**, 1700083.
- 9 X. Liang, C. Hart, Q. Pang, A. Garsuch, T. Weiss and L. F. Nazar, *Nat. Commun.*, 2015, **6**, 5682.
